# Supplementary material for: Simultaneous determination of 169 veterinary drugs in chicken eggs with EMR-Lipid clean-up using ultra-high performance liquid chromatography tandem mass spectrometry
Source: Royal Society of Chemistry journal article supplement (doi:10.1039/c9ay00275h), 2019-01-01
Supplement: c9ay00275h1.pdf [file c9ay00275h1.pdf]

**Supplementary Table 1** The MS/MS parameters of 169 veterinary drugs in chicken eggs

| Analytes              | ESI | MRMTransition1 | Fragment(CE) | MRMTransition2 | Fragment(CE) | RT   | Recovery<br>(RSD%)<br>1ppb | Recovery<br>(RSD%)<br>5ppb | Recovery<br>(RSD%)<br>20ppb | LOD (µg<br>/kg) | LOQ (µg<br>/kg) | MRL (µg/kg) |
|-----------------------|-----|----------------|--------------|----------------|--------------|------|----------------------------|----------------------------|-----------------------------|-----------------|-----------------|-------------|
| <b>β-Agonists(9)</b>  |     |                |              |                |              |      |                            |                            |                             |                 |                 |             |
| Cimaterol             | +   | 220.1 > 116.1  | 80(36)       | 220.1 > 160.1  | 80(12)       | 3.6  | 87(7)                      | 104(4)                     | 102(5)                      | 0.21            | 0.69            |             |
| Clenbuterol           | +   | 277.1 > 203.0  | 103(12)      | 277.1 > 259.1  | 103(4)       | 6.4  | 102(5)                     | 105(4)                     | 103(5)                      | 0.20            | 0.66            |             |
| Clorprenaline         | +   | 214.1 > 153.9  | 112(12)      | 214.1 > 196    | 112(8)       | 5.5  | 93(6)                      | 103(3)                     | 103(6)                      | 0.18            | 0.59            |             |
| Penbutolol            | +   | 292.2 > 236.0  | 122(12)      | 292.2 > 133    | 122(24)      | 13.3 | 99(3)                      | 107(4)                     | 106(5)                      | 0.09            | 0.30            |             |
| Propanolol            | +   | 260.0 > 116.0  | 95(16)       | 260.0 > 56     | 95(28)       | 9.1  | 95(8)                      | 114(4)                     | 104(5)                      | 0.20            | 0.66            |             |
| Ractopamine           | +   | 302.2 > 164.1  | 100(12)      | 302.2 > 284.2  | 100(8)       | 5.3  | 78(16)                     | 116(8)                     | 99(5)                       | 0.37            | 1.22            |             |
| Salbutamol            | +   | 240.2 > 148.1  | 88(16)       | 240.2 > 222.2  | 88(4)        | 3.5  | 92(5)                      | 96(3)                      | 103(4)                      | 0.10            | 0.33            |             |
| Terbutaline           | +   | 226.1 > 152.1  | 93(12)       | 226.1 > 107.1  | 93(28)       | 3.5  | 95(6)                      | 100(4)                     | 102(4)                      | 0.01            | 0.03            |             |
| Tulobuterol           | +   | 228.1 > 154.0  | 98(12)       | 228.1 > 119.1  | 98(32)       | 6.4  | 101(5)                     | 105(4)                     | 106(5)                      | 0.12            | 0.40            |             |
| <b>Androgens(4)</b>   |     |                |              |                |              |      |                            |                            |                             |                 |                 |             |
| 19-nortestosterone    | +   | 275.2 > 109.0  | 151(32)      | 275.2 > 91.1   | 151(56)      | 14.3 | 68(17)                     | 91(16)                     | 102(10)                     | 0.10            | 0.33            |             |
| Megestrol acetate     | +   | 385.2 > 325.2  | 128(8)       | 385.2 > 267.2  | 128(12)      | 16.2 | 114(14)                    | 112(8)                     | 102(5)                      | 0.52            | 1.72            |             |
| Methyltestosterone    | +   | 303.2 > 97.1   | 166(32)      | 303.2 > 109.1  | 166(32)      | 15.1 | 114(31)                    | 106(11)                    | 109(8)                      | 1.80            | 5.94            |             |
| Testosterone          | +   | 289.2 > 109.0  | 146(32)      | 289.2 > 97     | 146(36)      | 14.7 | 57(13)                     | 105(13)                    | 101(5)                      | 0.19            | 0.63            |             |
| <b>Avermectins(5)</b> |     |                |              |                |              |      |                            |                            |                             |                 |                 |             |
| Avermectin B1a (Na)   | +   | 895.5 > 751.4  | 340(48)      | 895.5 > 449.3  | 340(48)      | 18.1 | 105(23)                    | 117(18)                    | 124(13)                     | 3.81            | 12.57           |             |
| Doramectin (Na)       | +   | 921.5 > 449.3  | 320(56)      | 921.5 > 777.4  | 320(44)      | 18.7 | 77(24)                     | 114(5)                     | 101(8)                      | 0.82            | 2.71            |             |
| Eprinomectin B1a (Na) | +   | 936.5 > 490.2  | 305(56)      | 936.5 > 352.1  | 305(60)      | 17.6 | 118(26)                    | 97(8)                      | 102(6)                      | 1.10            | 3.63            |             |
| Ivermectin B1a (Na)   | +   | 897.5 > 753.4  | 340(52)      | 897.5 > 183    | 340(56)      | 19.6 | 110(14)                    | 106(5)                     | 96(9)                       | 0.47            | 1.55            |             |

|                            |   |               |         |               |         |      |         |         |         |      |      |     |
|----------------------------|---|---------------|---------|---------------|---------|------|---------|---------|---------|------|------|-----|
| Lasalocid A(Na)            | + | 613.4 > 377.3 | 232(40) | 613.4 > 577.3 | 232(36) | 20.4 | 98(5)   | 98(5)   | 94(10)  | 0.51 | 1.68 |     |
| <b>Benzimidazoles(16)</b>  |   |               |         |               |         |      |         |         |         |      |      |     |
| 2-aminoflubendazole        | + | 256.1 > 95.0  | 120(40) | 256.1 > 123   | 120(40) | 7.6  | 95(7)   | 108(4)  | 101(5)  | 0.20 | 0.66 |     |
| 5-hydroxymebendazole       | + | 298.1 > 266.1 | 156(25) | 298.1 > 79.1  | 156(44) | 6.9  | 98(9)   | 104(3)  | 100(5)  | 0.31 | 1.02 |     |
| Albendazole                | + | 266.1 > 234.1 | 155(16) | 266.1 > 191   | 155(32) | 10.6 | 101(7)  | 102(3)  | 102(5)  | 0.19 | 0.63 |     |
| Albendazole sulfone        | + | 298.1 > 159.0 | 120(40) | 298.1 > 266.1 | 120(20) | 8.2  | 101(7)  | 100(3)  | 101(5)  | 0.18 | 0.59 |     |
| Albendazole sulfoxide      | + | 282.1 > 239.9 | 127(12) | 282.1 > 208   | 127(24) | 5.8  | 93(15)  | 106(5)  | 106(5)  | 0.35 | 1.16 |     |
| Albendazole-2-aminosulfone | + | 240.1 > 198.0 | 120(20) | 240.1 > 133.1 | 120(20) | 4.4  | 75(15)  | 106(5)  | 92(4)   | 0.40 | 1.32 |     |
| Cambendazole               | + | 303.1 > 261.0 | 145(16) | 303.1 > 217.1 | 145(32) | 7.6  | 109(5)  | 104(4)  | 104(5)  | 0.20 | 0.66 |     |
| Fenbendazole               | + | 300.1 > 268.1 | 156(20) | 300.1 > 159   | 156(36) | 13.6 | 100(7)  | 108(6)  | 101(6)  | 0.21 | 0.69 |     |
| Flubendazole               | + | 314.1 > 282.1 | 146(20) | 314.1 > 123   | 146(36) | 11.9 | 94(3)   | 103(5)  | 106(6)  | 0.10 | 0.33 | 400 |
| Mebendazole                | + | 296.1 > 264.1 | 176(20) | 296.1 > 77    | 176(48) | 10.8 | 99(5)   | 107(6)  | 101(6)  | 0.07 | 0.23 |     |
| Mebendazole-amine          | + | 238.1 > 77.1  | 176(40) | 238.1 > 105.1 | 176(28) | 7.0  | 94(6)   | 103(3)  | 105(6)  | 0.16 | 0.53 |     |
| Oxfendazole                | + | 316.1 > 159.0 | 166(32) | 316.1 > 284   | 166(16) | 8.1  | 116(15) | 101(4)  | 100(6)  | 0.52 | 1.72 |     |
| Oxfendazole sulfone        | + | 332.1 > 300.1 | 156(20) | 332.1 > 159   | 156(40) | 10.9 | 93(6)   | 105(4)  | 102(5)  | 0.22 | 0.73 |     |
| Oxibendazole               | + | 250.1 > 218.1 | 151(16) | 250.1 > 176.1 | 151(28) | 8.2  | 107(4)  | 104(1)  | 102(5)  | 0.10 | 0.33 |     |
| Thiabendazole              | + | 202.0 > 131.0 | 130(36) | 202.0 > 175   | 130(24) | 4.5  | 108(7)  | 102(5)  | 103(5)  | 0.01 | 0.03 |     |
| Triclabendazole            | + | 359.0 > 274.0 | 176(40) | 359.0 > 359.0 | 176(0)  | 16.1 | 101(5)  | 111(6)  | 100(6)  | 0.02 | 0.07 |     |
| <b>Cephems(11)</b>         |   |               |         |               |         |      |         |         |         |      |      |     |
| Cefaclor                   | + | 368.1 > 118.0 | 92(35)  | 368.1 > 106   | 92(35)  | 4.4  | 117(22) | 111(17) | 90(8)   | 0.20 | 0.66 |     |
| cefamandole                | + | 463.1 > 347.0 | 97(4)   | 463.1 > 158   | 97(16)  | 8.8  | 74(25)  | 105(14) | 102(9)  | 0.05 | 0.17 |     |
| Cefapirin                  | + | 424.1 > 291.9 | 132(12) | 424.1 > 151.9 | 132(28) | 4.0  | 118(29) | 110(10) | 101(7)  | 0.06 | 0.20 |     |
| Cefazolin                  | + | 455.0 > 323.0 | 127(8)  | 455.0 > 156   | 127(11) | 6.3  | 106(15) | 90(11)  | 106(11) | 1.40 | 4.62 |     |
| Cefetamet pivoxyl          | + | 512.1 > 241.0 | 149(16) | 512.1 > 125.9 | 149(52) | 14.0 | 100(6)  | 98(6)   | 95(3)   | 0.20 | 0.66 |     |

|                                |   |                |         |                |         |      |         |         |         |      |      |     |
|--------------------------------|---|----------------|---------|----------------|---------|------|---------|---------|---------|------|------|-----|
| Cefoperazone                   | + | 646.2 > 530.2  | 122(8)  | 646.2 > 147.9  | 122(60) | 8.0  | 118(30) | 123(26) | 98(15)  | 0.16 | 0.53 |     |
| Cefotaxime                     | + | 456.1 > 395.9  | 132(4)  | 456.1 > 324    | 132(8)  | 5.4  | 91(21)  | 89(23)  | 80(23)  | 0.01 | 0.03 |     |
| Ceftiofur                      | + | 524.0 > 241.0  | 141(16) | 524.0 > 210    | 141(20) | 9.3  | 102(31) | 97(5)   | 108(6)  | 0.06 | 0.20 |     |
| Cephalexin                     | + | 348.1 > 157.9  | 120(10) | 348.1 > 140    | 120(25) | 4.8  | 74(20)  | 96(13)  | 92(8)   | 1.91 | 6.30 |     |
| Cephalonium                    | + | 459.1 > 337.0  | 107(8)  | 459.1 > 152    | 107(20) | 5.0  | 75(24)  | 80(18)  | 103(11) | 0.11 | 0.36 |     |
| Cephradine                     | + | 350.1 > 175.9  | 102(17) | 350.1 > 157.9  | 102(8)  | 5.1  | 73(24)  | 80(14)  | 107(7)  | 1.70 | 5.61 |     |
| <b>Chloramphenicols(3)</b>     |   |                |         |                |         |      |         |         |         |      |      |     |
| Chloramphenicol                | - | 321.0 > 121.0  | 113(36) | 321.0 > 152.1  | 113(14) | 9.3  | 92(16)  | 90(13)  | 106(9)  | 0.42 | 1.39 |     |
| Florfenicol                    | - | 356.0 > 185.1  | 141(12) | 356.0 > 119    | 141(28) | 8.6  | 102(28) | 86(11)  | 110(9)  | 1.45 | 4.79 | 0   |
| Thiamphenicol                  | - | 354.0 > 289.9  | 164(8)  | 354.0 > 185    | 164(16) | 5.8  | 105(25) | 105(17) | 98(8)   | 1.73 | 5.71 |     |
| <b>Glucocorticosteroids(4)</b> |   |                |         |                |         |      |         |         |         |      |      |     |
| Flumethasone                   | + | 411.2 > 391.1  | 150(4)  | 411.2 > 253.1  | 150(12) | 13.2 | 88(29)  | 106(20) | 124(10) | 1.70 | 5.61 |     |
| Hydrocortisone                 | + | 363.4 > 121.1  | 125(20) | 363.4 > 327.2  | 125(8)  | 10.9 | 89(4)   | 117(7)  | 108(4)  | 0.09 | 0.30 |     |
| Triamcinolone                  | + | 395.2 > 375.0  | 150(8)  | 395.2 > 357.2  | 150(12) | 8.6  | 115(28) | 86(24)  | 107(18) | 0.12 | 0.40 |     |
| Triamcinolone acetonide        | + | 435.2 > 415.2  | 150(8)  | 435.2 > 397.1  | 150(16) | 13.7 | 106(28) | 116(15) | 108(12) | 0.10 | 0.33 |     |
| <b>Macrolides(6)</b>           |   |                |         |                |         |      |         |         |         |      |      |     |
| Erythromycin                   | + | 734.5 > 158.0  | 174(32) | 734.5 > 576.1  | 174(16) | 10.7 | 57(22)  | 104(14) | 91(17)  | 0.52 | 1.72 | 150 |
| Kitasamycin                    | + | 772.5 > 108.9  | 248(48) | 772.5 > 174    | 248(36) | 13.0 | 99(28)  | 109(7)  | 104(4)  | 0.01 | 0.03 |     |
| Oleandomycin                   | + | 688.3 > 544.3  | 170(15) | 688.3 > 158.2  | 170(25) | 9.8  | 119(7)  | 111(8)  | 97(6)   | 0.30 | 0.99 |     |
| Tilmicosin                     | + | 869.6 > 174.1  | 320(48) | 869.6 > 696.4  | 320(44) | 8.9  | 121(11) | 108(10) | 101(6)  | 0.09 | 0.30 |     |
| Tylosin                        | + | 916.5 > 174.1  | 280(40) | 916.5 > 772.4  | 280(30) | 11.8 | 102(12) | 100(6)  | 102(4)  | 0.40 | 1.32 | 200 |
| Tylvalosin                     | + | 1042.6 > 109.1 | 125(52) | 1042.6 > 173.9 | 125(45) | 14.3 | 81(17)  | 91(10)  | 110(5)  | 0.08 | 0.26 |     |
| <b>Nitroimidazoles(3)</b>      |   |                |         |                |         |      |         |         |         |      |      |     |
| Dimetridazole                  | + | 142.1 > 96.1   | 100(16) | 142.1 > 81.1   | 100(28) | 4.4  | 91(12)  | 104(4)  | 108(4)  | 0.33 | 1.09 |     |
| Metronidazole                  | + | 172.1 > 128.0  | 98(12)  | 172.1 > 82.1   | 98(24)  | 3.9  | 101(11) | 104(7)  | 103(6)  | 0.27 | 0.89 |     |

|                         |   |               |         |               |         |      |         |         |         |      |      |    |
|-------------------------|---|---------------|---------|---------------|---------|------|---------|---------|---------|------|------|----|
| Ronidazole              | + | 201.1 > 140.1 | 80(8)   | 201.1 > 55.2  | 80(25)  | 4.5  | 120(17) | 110(7)  |         | 0.63 | 2.08 |    |
| <b>Quinolones(16)</b>   |   |               |         |               |         |      |         |         |         |      |      |    |
| Ciprofloxacin           | + | 332.1 > 231.0 | 149(48) | 332.1 > 288   | 149(20) | 5.2  | 109(26) | 94(9)   | 96(8)   | 0.01 | 0.03 |    |
| Danofloxacin            | + | 358.2 > 340.1 | 151(20) | 358.2 > 82.1  | 151(48) | 5.5  | 108(16) | 90(20)  | 92(15)  | 0.22 | 0.73 |    |
| Difloxacin              | + | 400.1 > 299.1 | 156(32) | 400.1 > 382.1 | 156(20) | 6.7  | 77(12)  | 105(4)  | 90(9)   | 0.01 | 0.03 |    |
| Enoxacin                | + | 321.1 > 234.0 | 159(24) | 321.1 > 303.3 | 159(16) | 4.8  | 127(25) | 115(15) | 95(10)  | 0.64 | 2.11 |    |
| Enrofloxacin            | + | 360.2 > 316.2 | 156(16) | 360.2 > 342.2 | 156(20) | 5.7  | 102(25) | 111(18) | 94(9)   | 0.32 | 1.06 | 0  |
| Fleroxacin              | + | 370.1 > 326.0 | 150(20) | 370.1 > 268.9 | 150(24) | 5.1  | 94(16)  | 104(8)  | 95(11)  | 0.41 | 1.35 |    |
| Flumequine              | + | 262.1 > 202.0 | 108(32) | 262.1 > 244.1 | 108(12) | 13.0 | 94(19)  | 109(8)  | 95(8)   | 0.54 | 1.78 |    |
| Lomefloxacin            | + | 352.2 > 308.2 | 159(16) | 352.2 > 265   | 159(25) | 5.4  | 90(17)  | 92(7)   | 92(8)   | 0.50 | 1.65 |    |
| Nalidixic acid          | + | 233.1 > 215.1 | 150(20) | 233.1 > 159.1 | 150(40) | 12.3 | 107(8)  | 96(6)   | 101(6)  | 0.33 | 1.09 |    |
| Norfloxacin             | + | 320.1 > 302.1 | 150(35) | 320.1 > 282.1 | 150(40) | 5.0  | 94(19)  | 101(21) | 109(11) | 1.10 | 3.63 |    |
| Ofloxacin               | + | 362.2 > 318.2 | 149(20) | 362.2 > 261.1 | 149(20) | 5.0  | 115(20) | 113(10) | 103(12) | 0.01 | 0.03 |    |
| Orbifloxacin            | + | 396.2 > 352.1 | 159(16) | 396.2 > 295.1 | 159(28) | 5.9  | 96(8)   | 101(3)  | 99(6)   | 0.02 | 0.07 |    |
| Oxolinic acid           | + | 262.1 > 243.9 | 144(20) | 262.1 > 159.9 | 144(45) | 9.3  | 76(22)  | 99(13)  | 92(7)   | 2.03 | 6.70 | 50 |
| Pefloxacin              | + | 334.2 > 290.1 | 174(16) | 334.2 > 233.1 | 174(28) | 5.1  | 78(17)  | 116(15) | 91(10)  | 0.09 | 0.30 |    |
| Sarafloxacin            | + | 386.1 > 299.1 | 150(40) | 386.1 > 368.1 | 150(20) | 6.5  | 95(20)  | 102(11) | 107(5)  | 0.62 | 2.05 |    |
| Sparfloxacin            | + | 393.2 > 349.0 | 164(20) | 393.2 > 292.1 | 164(28) | 6.7  | 102(8)  | 104(4)  | 98(6)   | 0.01 | 0.03 |    |
| <b>Sulfonamides(24)</b> |   |               |         |               |         |      |         |         |         |      |      |    |
| Sulfabenzamide          | + | 277.1 > 155.9 | 150(12) | 277.1 > 92    | 150(36) | 9.9  | 121(23) | 107(8)  | 98(5)   | 0.01 | 0.03 |    |
| Sulfacetamide           | + | 215.0 > 155.9 | 80(4)   | 215.0 > 108   | 80(16)  | 4.3  | 118(28) | 119(8)  | 98(6)   | 1.50 | 4.95 |    |
| Sulfachloropyridazine   | + | 285.0 > 156.0 | 108(12) | 285.0 > 92.1  | 108(24) | 7.7  | 95(6)   | 103(4)  | 99(6)   | 0.25 | 0.83 |    |
| Sulfaclozine            | + | 285.0 > 155.9 | 122(20) | 285.0 > 108.1 | 122(24) | 9.9  | 76(12)  | 120(7)  | 103(6)  | 0.31 | 1.02 |    |
| Sulfadiazine            | + | 251.1 > 92.1  | 100(28) | 251.1 > 108.1 | 100(20) | 4.6  | 112(28) | 103(10) | 100(14) | 1.66 | 5.48 |    |
| Sulfadimethoxine        | + | 311.1 > 156.0 | 141(16) | 311.1 > 108.1 | 141(28) | 10.2 | 98(9)   | 102(4)  | 101(5)  | 0.31 | 1.02 |    |

|                         |   |               |         |               |          |      |         |         |         |      |      |     |
|-------------------------|---|---------------|---------|---------------|----------|------|---------|---------|---------|------|------|-----|
| Sulfadimidine           | + | 279.1 > 186.1 | 116(12) | 279.1 > 156   | 116(16)  | 6.1  | 88(24)  | 118(10) | 95(9)   | 1.70 | 5.61 |     |
| Sulfadoxine             | + | 311.1 > 156.0 | 126(16) | 311.1 > 92.1  | 126(32)  | 8.3  | 104(9)  | 106(6)  | 103(6)  | 0.31 | 1.02 |     |
| Sulfaguanidine          | + | 215.1 > 156.0 | 85(12)  | 215.1 > 108   | 85(24)   | 2.7  | 66(18)  | 87(16)  | 70(14)  | 1.68 | 5.54 |     |
| Sulfamerazine           | + | 265.1 > 92.1  | 114(28) | 265.1 > 156   | 114(12)  | 5.4  | 112(21) | 116(14) | 104(9)  | 0.13 | 0.43 |     |
| Sulfameter              | + | 281.1 > 92.0  | 150(40) | 281.1 > 215.1 | 150(20)  | 6.4  | 74(19)  | 111(9)  | 105(6)  | 1.62 | 5.35 |     |
| Sulfamethizole          | + | 271.0 > 156.0 | 112(9)  | 271.0 > 92    | 112(29)  | 6.1  | 83(18)  | 99(10)  | 106(4)  | 0.01 | 0.03 |     |
| Sulfamethoxazole        | + | 254.1 > 92.1  | 108(24) | 254.1 > 156   | 108(12)  | 8.3  | 97(19)  | 110(7)  | 105(7)  | 1.22 | 4.03 |     |
| Sulfamethoxypyridazine  | + | 281.1 > 92.1  | 128(32) | 281.1 > 108.1 | 128(28)  | 6.3  | 89(20)  | 115(8)  | 93(8)   | 0.51 | 1.68 |     |
| Sulfamonomethoxine      | + | 281.0 > 156.0 | 120(10) | 281.0 > 126   | 120(20)  | 6.4  | 103(15) | 96(18)  | 100(6)  | 1.57 | 5.18 |     |
| Sulfamoxole             | + | 268.1 > 155.9 | 150(20) | 268.1 > 112.5 | 150(24)  | 5.7  | 90(20)  | 99(11)  | 102(5)  | 0.06 | 0.20 |     |
| Sulfantran              | + | 336.1 > 156.0 | 150(8)  | 336.1 > 293.9 | 150(8)   | 13.3 | 119(24) | 102(13) | 115(12) | 1.31 | 4.32 |     |
| Sulfaphenazole          | + | 315.1 > 158.1 | 150(40) | 315.1 > 92    | 150(40)  | 10.6 | 96(19)  | 101(5)  | 106(7)  | 0.54 | 1.78 |     |
| Sulfapyridine           | + | 250.1 > 156.0 | 150(17) | 250.1 > 92    | 150(29)  | 5.0  | 79(16)  | 98(9)   | 112(5)  | 0.04 | 0.13 |     |
| Sulfaquinoxaline        | + | 301.1 > 156.0 | 118(16) | 301.1 > 92    | 118(32)  | 10.3 | 103(12) | 102(6)  | 108(5)  | 0.44 | 1.45 |     |
| Sulfathiazole           | + | 256.0 > 156.0 | 108(12) | 256.0 > 92.1  | 108(28)  | 4.8  | 95(21)  | 102(5)  | 107(8)  | 0.08 | 0.26 |     |
| Sulfisomidine           | + | 279.1 > 124.1 | 150(20) | 279.1 > 92    | 150(40)  | 4.1  | 92(19)  | 108(8)  | 110(6)  | 0.54 | 1.78 |     |
| Sulphisoxazole          | + | 268.1 > 156.0 | 150(10) | 268.1 > 92    | 150(40)  | 8.9  | 81(17)  | 108(10) | 110(6)  | 0.42 | 1.39 |     |
| Trimethoprim            | + | 291.2 > 261.1 | 151(24) | 291.2 > 123.1 | 151(24)  | 4.9  | 93(25)  | 117(9)  | 109(6)  | 1.63 | 5.38 |     |
| <b>Tetracyclines(4)</b> |   |               |         |               |          |      |         |         |         |      |      |     |
| Chlortetracycline       | + | 479.1 > 444.0 | 141(20) | 479.1 > 154.1 | 141(36)  | 7.6  | 92(12)  | 76(18)  | 80(21)  | 0.32 | 1.06 |     |
| Doxycycline             | + | 445.2 > 427.9 | 132(16) | 445.2 > 154   | 132(*32) | 8.3  | 94(21)  | 107(17) | 89(12)  | 0.12 | 0.40 | 0   |
| Oxytetracycline         | + | 461.2 > 426.1 | 146(14) | 461.2 > 201.1 | 146(48)  | 5.1  | 102(22) | 95(18)  | 59(24)  | 0.09 | 0.30 | 200 |
| Tetracycline            | + | 445.2 > 410.1 | 115(17) | 445.2 > 154.2 | 115(30)  | 5.6  | 88(13)  | 109(14) | 84(13)  | 0.07 | 0.23 |     |
| <b>β-lactams(2)</b>     |   |               |         |               |          |      |         |         |         |      |      |     |
| Amoxicillin             | + | 366.1 > 349.1 | 128(4)  | 366.1 > 207.9 | 128(12)  | 3.6  | 78(29)  | 103(11) | 107(5)  | 1.83 | 6.04 |     |



|                             |   |               |         |               |         |      |         |         |         |      |      |  |
|-----------------------------|---|---------------|---------|---------------|---------|------|---------|---------|---------|------|------|--|
| Clopidol                    | + | 192.1 > 51.0  | 110(48) | 192.1 > 101   | 110(25) | 4.4  | 108(16) | 93(5)   | 108(5)  | 0.74 | 2.44 |  |
| Decoquinat                  | + | 418.3 > 204.0 | 131(48) | 418.3 > 272.2 | 131(24) | 17.1 | 67(14)  | 83(10)  | 109(18) | 0.32 | 1.06 |  |
| Diclazuril                  | - | 405.0 > 334.0 | 118(20) | 405.0 > 334.8 | 118(16) | 15.7 | 82(12)  | 100(15) | 107(8)  | 0.31 | 1.02 |  |
| Ethopabate                  | + | 238.1 > 205.9 | 150(4)  | 238.1 > 135.9 | 150(36) | 10.0 | 96(30)  | 117(8)  | 93(8)   | 1.41 | 4.65 |  |
| Febantel                    | + | 447.1 > 383.1 | 128(16) | 447.1 > 415.1 | 128(10) | 15.8 | 89(4)   | 101(2)  | 100(4)  | 0.12 | 0.40 |  |
| Halofuginone                | + | 414.0 > 395.0 | 128(12) | 414.0 > 138.0 | 138(16) | 8.6  | 114(14) | 105(7)  | 98(6)   | 0.09 | 0.30 |  |
| Maduramicin(Na)             | + | 939.5 > 877.5 | 236(36) | 939.5 > 895.6 | 236(56) | 22.1 | 96(3)   | 99(4)   | 100(8)  | 0.10 | 0.33 |  |
| Nequinat                    | + | 366.2 > 334.1 | 169(16) | 366.2 > 200.9 | 169(32) | 15.4 | 87(9)   | 103(3)  | 96(8)   | 0.24 | 0.79 |  |
| Nicarbazine                 | - | 301.1 > 137.0 | 92(20)  | 301.1 > 106.9 | 92(45)  | 15.2 | 100(8)  | 112(7)  | 107(6)  | 0.01 | 0.03 |  |
| Robenidine                  | + | 334.1 > 111.0 | 156(56) | 334.1 > 155   | 156(16) | 13.9 | 94(11)  | 103(5)  | 98(4)   | 0.28 | 0.92 |  |
| Toltrazuril                 | - | 424.1 > 42.2  | 108(16) | 424.1 > 424.1 | 108(0)  | 16.0 | 117(13) | 104(13) | 108(11) | 2.52 | 8.32 |  |
| Toltrazuril sulfone         | - | 456.0 > 42.2  | 149(50) | 456.0 > 456   | 149(0)  | 15.3 | 116(26) | 87(15)  | 94(6)   | 1.90 | 6.27 |  |
| Toltrazuril sulfoxide       | - | 440.0 > 42.1  | 112(16) | 440.0 > 371   | 112(12) | 14.6 | 72(14)  | 105(21) | 103(13) | 0.09 | 0.30 |  |
| Zoalene                     | - | 224.0 > 42.1  | 92(8)   | 224.0 > 181.1 | 92(8)   | 8.2  | 80(20)  | 94(13)  | 94(10)  | 1.92 | 6.34 |  |
| <b>Triphenylmethanes(3)</b> |   |               |         |               |         |      |         |         |         |      |      |  |
| Basic violet 3              | + | 372.3 > 356.1 | 201(44) | 372.3 > 235   | 201(55) | 14.8 | 82(14)  | 109(23) | 92(21)  | 0.04 | 0.13 |  |
| Leucomalachite green        | + | 331.2 > 239.2 | 166(28) | 331.2 > 316.2 | 166(20) | 12.6 | 93(8)   | 103(4)  | 95(5)   | 0.23 | 0.76 |  |
| Malachite green             | + | 329.2 > 313.0 | 221(40) | 329.2 > 241   | 221(50) | 14.1 | 104(14) | 107(12) | 103(14) | 0.42 | 1.39 |  |
| <b>Pesticides(12)</b>       |   |               |         |               |         |      |         |         |         |      |      |  |
| Carbofuran                  | + | 222.1 > 123.1 | 110(30) | 222.1 > 165.1 | 110(20) | 13.4 | 100(10) | 105(5)  | 107(6)  | 0.31 | 1.02 |  |
| Chlordimeform               | + | 197.1 > 46.2  | 120(16) | 197.1 > 117   | 120(32) | 5.9  | 96(8)   | 106(2)  | 104(6)  | 0.22 | 0.73 |  |
| Coumaphos                   | + | 363.0 > 226.9 | 120(32) | 363.0 > 334.9 | 120(16) | 16.5 | 111(15) | 105(3)  | 106(7)  | 0.51 | 1.68 |  |
| Dichlorvos                  | + | 221.0 > 109.0 | 100(20) | 221.0 > 79    | 100(32) | 11.9 | 113(8)  | 110(3)  | 107(5)  | 0.52 | 1.72 |  |
| Fenthion sulfoxide          | + | 295.0 > 280.0 | 140(16) | 295.0 > 109   | 140(32) | 13.4 | 104(18) | 113(7)  | 107(6)  | 0.63 | 2.08 |  |
| Dimetridazol-OH             | + | 158.1 > 140.0 | 98(8)   | 158.1 > 55.2  | 98(20)  | 4.8  | 118(28) | 82(18)  | 109(15) | 1.54 | 5.08 |  |

|                        |   |               |         |               |         |      |         |         |        |      |      |    |
|------------------------|---|---------------|---------|---------------|---------|------|---------|---------|--------|------|------|----|
| Hydroxymetronidazole   | + | 188.1 > 126.1 | 93(16)  | 188.1 > 123.1 | 93(8)   | 3.7  | 98(25)  | 99(11)  | 81(15) | 0.42 | 1.39 |    |
| Hydroxy-thiabendazole  | + | 218.0 > 191.0 | 120(32) | 218.0 > 81    | 120(45) | 3.9  | 111(27) | 114(9)  | 90(14) | 1.63 | 5.38 |    |
| Malathion              | + | 331.0 > 126.9 | 130(5)  | 331.0 > 99    | 130(5)  | 15.8 | 112(11) | 95(13)  | 101(7) | 0.42 | 1.39 |    |
| Pentachlorophenol      | - | 262.9 > 262.9 | 126(0)  | 262.9 > 262.9 | 126(0)  | 16.5 | 105(5)  | 106(6)  | 106(1) | 0.98 | 3.23 |    |
| Propetamphos           | + | 282.1 > 137.9 | 125(20) | 282.1 > 156   | 125(4)  | 16.0 | 80(21)  | 112(16) | 89(8)  | 2.75 | 9.08 |    |
| Trichlorfon            | + | 256.9 > 109.0 | 120(12) | 256.9 > 79    | 120(33) | 6.7  | 105(24) | 115(10) | 104(5) | 1.82 | 6.01 |    |
| <b>Nitros(4)</b>       |   |               |         |               |         |      |         |         |        |      |      |    |
| 4,6-dinitro-o-cresol   | - | 197.0 > 179.9 | 120(20) | 197.0 > 137.1 | 120(20) | 14.6 | 94(7)   | 99(2)   | 110(6) | 0.20 | 0.66 |    |
| 4-nitrophenol          | - | 138.0 > 107.9 | 112(20) | 138.0 > 92    | 112(24) | 9.4  | 100(28) | 106(6)  | 96(5)  | 0.90 | 2.97 |    |
| ANOT                   | + | 196.1 > 107.0 | 122(20) | 196.1 > 153   | 122(12) | 4.4  | 64(30)  | 108(6)  | 114(6) | 1.23 | 4.06 |    |
| Nitrovin               | + | 361.1 > 58.1  | 169(32) | 361.1 > 221.9 | 169(16) | 10.9 | 109(23) | 100(6)  | 102(9) | 0.01 | 0.03 |    |
| <b>Tranquilizer(2)</b> |   |               |         |               |         |      |         |         |        |      |      |    |
| Azaperol               | + | 330.2 > 149.0 | 144(28) | 330.2 > 121   | 144(20) | 4.7  | 102(14) | 90(8)   | 96(6)  | 0.43 | 1.42 |    |
| Azaperone              | + | 328.2 > 165.1 | 150(20) | 328.2 > 121.1 | 150(20) | 5.4  | 89(7)   | 99(3)   | 106(5) | 0.01 | 0.03 |    |
| <b>Others(8)</b>       |   |               |         |               |         |      |         |         |        |      |      |    |
| Virginiamycin M1       | + | 526.3 > 355.0 | 149(16) | 526.3 > 508.1 | 149(12) | 14.1 | 114(20) | 99(16)  | 104(9) | 2.43 | 8.02 |    |
| Monensin               | + | 693.5 > 675.3 | 252(40) | 693.5 > 461.3 | 252(60) | 20.9 | 95(3)   | 97(3)   | 98(6)  | 0.12 | 0.40 |    |
| Valnemulin             | + | 567.4 > 264.2 | 144(16) | 567.4 > 163   | 144(28) | 13.5 | 94(16)  | 96(17)  | 107(8) | 0.05 | 0.17 |    |
| Amantadine             | + | 152.1 > 135.0 | 112(18) | 152.1 > 93.1  | 112(32) | 5.1  | 95(5)   | 107(3)  | 102(5) | 0.23 | 0.76 |    |
| Nitroxynil             | - | 288.9 > 127.0 | 159(28) | 288.9 > 162   | 159(20) | 14.0 | 95(5)   | 101(7)  | 97(8)  | 1.05 | 3.47 |    |
| Olaquinox              | + | 264.1 > 143.0 | 127(40) | 264.1 > 102   | 127(56) | 3.7  | 95(5)   | 110(13) | 121(4) | 0.12 | 0.40 |    |
| Lincomycin             | + | 407.2 > 126.1 | 150(29) | 407.2 > 359.2 | 150(20) | 4.3  | 95(5)   | 101(3)  | 100(4) | 0.24 | 0.79 | 50 |
| Levamisole             | + | 205.1 > 178.1 | 141(20) | 205.1 > 123   | 141(32) | 4.5  | 95(5)   | 109(4)  | 102(5) | 0.02 | 0.07 |    |

NSAID: Non-steroidal anti-inflammatory drug; ANOT:3-Amino-5-nitro-o-toluamide
